# Supplementary material for: Heat activation is intrinsic to the pore domain of TRPV1
Source: PubMed Central journal article supplement — Proc Natl Acad Sci U S A. 2017 Dec 26;115(2):E317–24. doi: 10.1073/pnas.1717192115 (PMC5777071; doi:10.1073/pnas.1717192115), 2017-12-26
Supplement: pnas.201717192SI.pdf [file pnas.201717192SI.pdf]

# Supporting Information

Zhang et al. 10.1073/pnas.1717192115

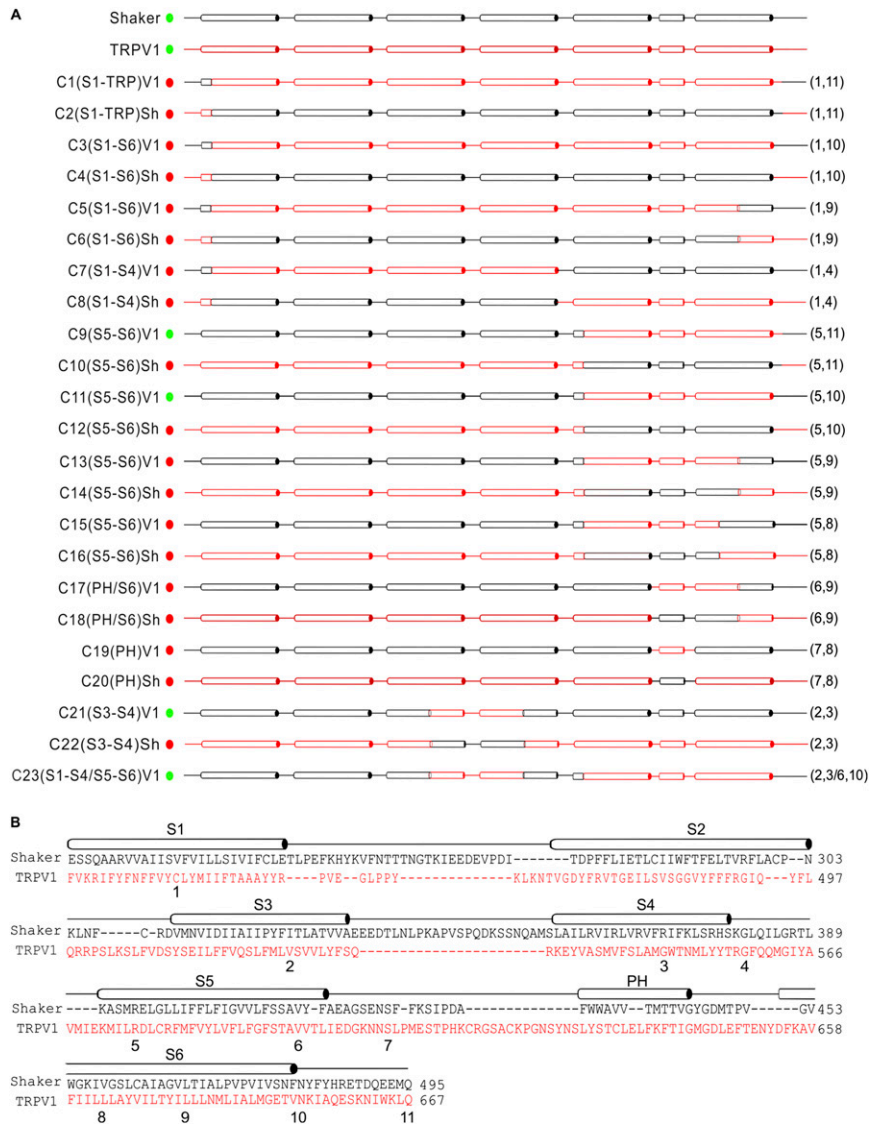

**Fig. S1.** (A) Summary of chimeras constructed between TRPV1 and the Shaker Kv channel. Functional (green circles) and nonfunctional (red circles) constructs are named based on the region being transferred. Nomenclature on the *Left* of each construct is CX [region transferred] donor channel, where x is a number assigned to each chimera. Splice site codes for each construct are shown to the *Right* of the chimera and the code is depicted on the alignment of Shaker and TRPV1 (B). Transferred regions include the residue in the TRPV1 sequence directly above the code number.

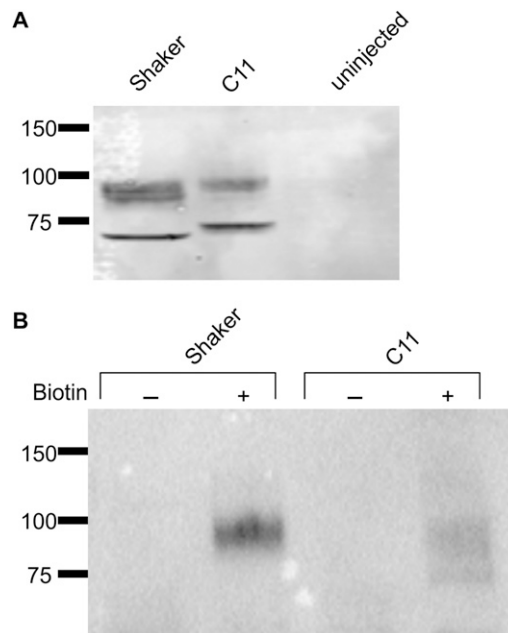

**Fig. S2.** Biochemical detection of Shaker and C11 surface expression. (A) Western blot from a SDS PAGE gel of the total protein fraction solubilized from cells expressing 1D4-tagged Shaker, the C11 chimera or no exogenous proteins. For Shaker, the lower molecular weight band (~70 kDa) is the core glycosylated species found in the ER, whereas the broad higher molecular weight band (~80–95 kDa) corresponds to a more heavily glycosylated species found in the Golgi and on the plasma membrane. For C11, the most abundant species migrates at a molecular weight slightly heavier than the core glycosylated species of Shaker, which is expected because the external pore domain of TRPV1 contains 24 additional residues compared with Shaker. A higher molecular weight band is also evident for C11, and this band is broader than the lower molecular weight species when viewed with higher exposure. (B) Western blot from a SDS/PAGE gel of the surface protein fraction obtained by biotinylation of cells and then purifying biotinylated proteins using streptavidin beads. For Shaker, only the heavily glycosylated species is seen in the surface fraction, consistent with previous results (1, 2). For C11, both core and heavily glycosylated species are evident in the surface fraction. Glycosylation of C11 would be expected to be complex because this construct contains glycosylation sites from Shaker (at N259 and N263 within the S1–S2 loop) (1, 3) and TRPV1 (at N604 within the outer pore domain) (4). Similar results were obtained in three separate experiments.

1. Silberberg SD, Chang TH, Swartz KJ (2005) Secondary structure and gating rearrangements of transmembrane segments in rat P2X4 receptor channels. *J Gen Physiol* 125:347–359.
2. Hackos DH, Chang TH, Swartz KJ (2002) Scanning the intracellular S6 activation gate in the shaker K<sup>+</sup> channel. *J Gen Physiol* 119:521–532.
3. Santacruz-Toloza L, Huang Y, John SA, Papazian DM (1994) Glycosylation of shaker potassium channel protein in insect cell culture and in *Xenopus* oocytes. *Biochemistry* 33:5607–5613.
4. Veldhuis NA, et al. (2012) N-glycosylation determines ionic permeability and desensitization of the TRPV1 capsaicin receptor. *J Biol Chem* 287:21765–21772.
